# Supplementary material for: Biosorption potential of natural, pyrolysed and acid-assisted pyrolysed sugarcane bagasse for the removal of lead from contaminated water
Source: PeerJ. 2018 Sep 28;6:e5672. doi: 10.7717/peerj.5672 (PMC6166628; doi:10.7717/peerj.5672)
Supplement: Data S1 [file peerj-06-5672-s001.xlsx]

## Sheet: Datafile (doze)
biosorbent type	biosorbent mass (g)	Pb conc. (ppm)	Final concentration	q (mg/g)	R(%)
APB	1	7	0.12	0.688	98.2857
APB	0.75	7	0.4	0.88	94.2857
APB	0.5	7	0.95	1.21	86.4286
APB	0.25	7	1.51	2.196	78.4286
NB	1	7	0.71	0.629	89.8571
NB	0.75	7	1.06	0.792	84.8571
NB	0.5	7	1.69	1.062	75.8571
NB	0.25	7	2.77	1.692	60.4286
PB	1	7	0.35	0.665	95
PB	0.75	7	0.63	0.849333	91
PB	0.5	7	1.06	1.188	84.8571
PB	0.25	7	1.77	2.092	74.7143
APB	1	15	0.75	1.425	95
APB	0.75	15	1.35	1.82	91
APB	0.5	15	2.4	2.52	84
APB	0.25	15	3.6	4.56	76
NB	1	15	2.6145	1.23855	82.57
NB	0.75	15	3.11445	1.58474	79.237
NB	0.5	15	4.33155	2.13369	71.123
NB	0.25	15	6.23815	3.50474	58.4123
PB	1	15	1.35	1.365	91
PB	0.75	15	2.085	1.722	86.1
PB	0.5	15	2.949	2.4102	80.34
PB	0.25	15	4.182	4.3272	72.12
APB	1	30	3	2.7	90
APB	0.75	30	4.5	3.4	85
APB	0.5	30	6	4.8	80
APB	0.25	30	8.4	8.64	72
NB	1	30	9	2.1	70
NB	0.75	30	9.6	2.72	68
NB	0.5	30	11.4	3.72	62
NB	0.25	30	13.5	6.6	55
PB	1	30	4.5	2.55	85
PB	0.75	30	6	3.2	80
PB	0.5	30	8.1	4.38	73
PB	0.25	30	9.9	8.04	67
APB	1	60	10.2	4.98	83
APB	0.75	60	11.4	6.48	81
APB	0.5	60	14.4	9.12	76
APB	0.25	60	18.6	16.56	69
NB	1	60	21	3.9	65
NB	0.75	60	22.8	4.96	62
NB	0.5	60	25.8	6.84	57
NB	0.25	60	29.4	12.24	51
PB	1	60	13.2	4.68	78
PB	0.75	60	15.6	5.92	74
PB	0.5	60	18	8.4	70
PB	0.25	60	22.2	15.12	63
APB	1	120	24	9.6	80
APB	0.75	120	30	12	75
APB	0.5	120	33.6	17.28	72
APB	0.25	120	42	31.2	65
NB	1	120	52.8	6.72	56
NB	0.75	120	55.2	8.64	54
NB	0.5	120	57.6	12.48	52
NB	0.25	120	62.4	23.04	48
PB	1	120	32.4	8.76	73
PB	0.75	120	39.6	10.72	67
PB	0.5	120	43.2	15.36	64
PB	0.25	120	50.4	27.84	58
